# Supplementary material
Source: MDPI journal article supplement (https://www.mdpi.com/2311-7524/8/6/535)

**Figure S1.** No production of diffusible antifungal compounds of (a) *Vishniacozyma victoriae* EPL4.5 and (b) *Vishniacozyma victoriae* EPL29.5 on Potato Dextrose Agar (PDA) medium at 20°C. Lawns on plate *Phlyctema vagabunda*.

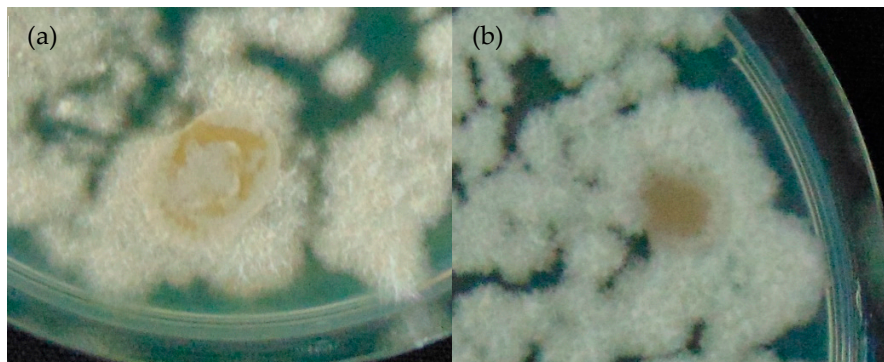

**Figure S2.** Lack of attachment of (a) *Vishniacozyma victoriae* EPL4.5 and (b) *Vishniacozyma victoriae* EPL29.5 to the hyphae of *Phlyctema vagabunda*, after 24 h incubation at 20 °C on Potato Dextrose Agar (PDA) medium.

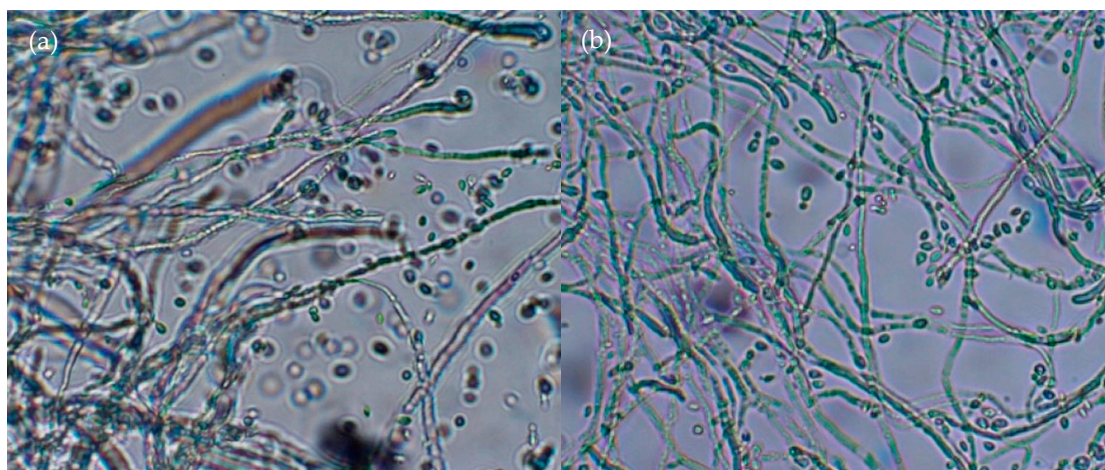

**Figure S3.** No detection of siderophore production by (a) *Vishniacozyma victoriae* EPL4.5 and (b) *Vishniacozyma victoriae* EPL29.5 after 15 days of incubation at 20°C on Chrome Azurol S (CAS) agar medium.

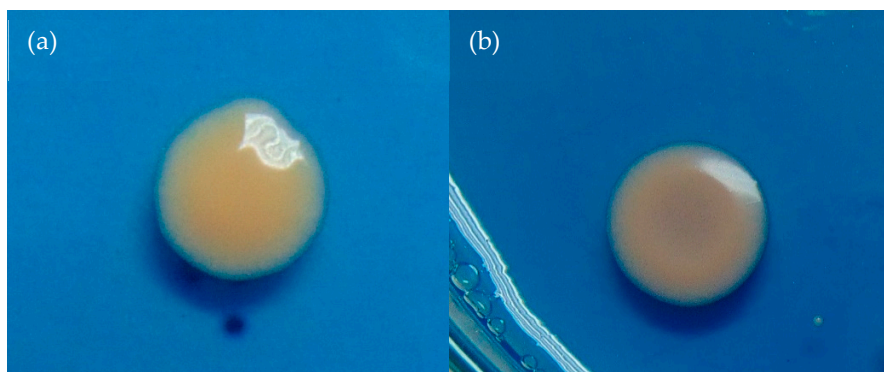

Supplement: s1 [file s1]
